# Supplementary material for: Regional Dynamics and Policy Evolution: A Comprehensive Review of China’s Fertility Policies (1980-2021)
Source: Research Square preprint supplement (doi:10.21203/rs.3.rs-7357906/v1), 2025-09-02
Supplement: Supplementary file 1 [file 3a72d6b4a7344ef25a7b56b3.xlsx]

## Sheet: one-child policy era 2nd
	CHINA'S FERTILITY- CONTROL POLICIES DATABASE
	POLICY DOMAINS IN WHICH EXCEPTIONS TO THE ONE-CHILD POLICY WERE ALLOWED, BY PROVINCE AND PERIOD
Province	Year	Policy domain:
		Rural	Rural, first birth girl	Minority	Only child	Remarriage	Other
Beijing	1991, 1999, 2003	Wife rural, husband join wife’s household (only applies to one sister in wife’s household), live in faraway area and one is disabled veteran.	Rural and live in mountains	Migrated from boarder area and was authorized to have a second birth at the previous residence	both	yes	Child disabled, adoption, husband’s brothers are all infertile and childless), Birth interval no less than 4 years and wife no younger than 28
Beijing	2014	As Beijing 1991	As Beijing 1991	As Beijing 1991	one	As Beijing 1991	As Beijing 1991
Tianjin	1988, 1994, 1997, 2002	One is disabled veteran, or one is the only child, or husband join wife’s household, or all brothers are infertile	Live in mountain area	Minority moved to Tianjin already pregnant from areas where the birth was allowed	both	One child in total before remarriage	Child disabled, infertile and adoption, returned from abroad/HK/Macao/Taowan, birth intervals 4 years (except that wife more than 28 or first birth when remarried or pregnant after adoption since 2002)
Tianjin	2014	As Tianjin 1988	As Tianjin 1988	As Tianjin 1988	one	As Tianjin 1988	As Tianjin 1988
Hebei	1994, 1997, 2001, 2003	Husband joins wife’s household	yes	Both	Both	One childless and the other one child, or one childless and the other widowed and has two children	Fishman or rural hukou living in the mountains. Child disabled, adoption, disabled due to public service (2B), mine workers for 5 years and has a daughter, birth interval 4 years and women more than 28
Hebei	2014, 2015	As Hebei 1994	As Hebei 1994	As Hebei 1994	one	As Hebei 1994	As Hebei 1994
Shanxi	1999, 2002, 2008	Both rural and (husband join wife’s household (only applies to one sister), or brothers of husband all infertile and more than 30)	Both rural	both	both	One childless and the other has one child, or one childless and the other widowed with two children, or each has one child but both guardianships belong to previous partner	Both rural and live in poor mountainous area for more than 7 years. Child disabled, returned from abroad/HK/Macao/Taiwan, infertile and adoption, wife more than 28 when having the second birth.
Shanxi	2014	As Shanxi 1999	As Shanxi 1999	As Shanxi 1999	one	As Shanxi 1999	As Shanxi 1999
Inner Mongolia	1990, 1995, 1999, 2002, 2008	Both rural and one disabled	Both rural	Mongolian, other minorities (less than 10 million)	Both	One childless and the other has at most 2 children and (widowed or one being minority) or each has one child and both minority	Disabled child, infertile and adoption, mine workers for 5 years, couples could decide which ethnic rule to follow if belong to different ethnic groups. Birth interval 4 years for Han and 3 years for minority.
Inner Mongolia	2014	As Mongolia 1990	As Mongolia 1990	As Mongolia 1990	one	As Mongolia 1990	As Mongolia 1990
Liaoning	1992, 1997, 2003, 2004, 2006	Both rural and (one only child, or husband joining wife’s household, or one minority, or all brothers are infertile, or one disabled)	Wife is rural	Both minority and wife is rural	Both	One childless and the other has one child, or one has two children and the other childless and more than 30	Both living in islands for more than 5 years. Child disabled
Liaoning	2014	As Liaoning 1992	As Liaoning 1992	As Liaoning 1992	one	As Liaoning 1992	As Liaoning 1992
Jilin	1993, 1997	All siblings of one couple are infertile, one is disabled veteran	Both rural and (wife age than more 30, or one is only child), or one couple is disabled	Both	Both	One childless, or one childless and more than 30 and the other is widowed with two children	Child disabled, returned from abroad/HK/Macao/Taiwan, infertile and adoption
Jilin	2002	Both rural and (one is only child, or Husband join wife’s household), the rest as Jilin 1993	Both Agriculture, forestry, animal husbandry, sideline occupations and fishing	As Jilin 1993	As Jilin 1993	Both rural or Agriculture, forestry, animal husbandry, sideline occupations and fishing with no salary and one is childless, or one widowed and the other childless	As Jilin 1993
Jilin	2011	As Jilin 2002	As Jilin 2002	As Jilin 1993	As Jilin 1993	One childless	Live in border areas, others as Jilin 1993
Jilin	2014	As Jilin 2002	As Jilin 2002	As Jilin 1993	one	As Jilin 2011	As Jilin 1993
Heilongjiang	1989, 1994, 2000, 2002	Both rural and live in the border area, rural and only one brother of the husband is fertile and no brothers adopted (deleted since 2000)	Both rural	Both, or one is certain minority	Both	One childless and the other has one child more than 4 years ago, or one is childless and more than 28 and the other widowed with two children	Birth interval 4 years and wife more than 28
Heilongjiang	2014, 2015	As Heilongjiang 2000	As Heilongjiang 1989	As Heilongjiang 1989	one	As Heilongjiang 1989	Birth interval restriction deleted
Shanghai	1990, 1996, 1997, 2002	one is only child, husband join wife’s household and all sister only has one child, or fishman for 5 years, or disabled veteran (2B)		Moved to shanghai already pregnant from areas where the birth is allowed	both	One child in total before remarriage	Child disabled, returned from abroad/HK/Macao/Taiwan, birth intervals 4 years
Shanghai	2014	As Shanghai 1990		As Shanghai 1999	one	As Shanghai 1999	As Shanghai 1999
Jiangsu	1997	Wife is rural and (one is the only child, or husband’s brothers all have one child or infertile, or one’s original family has one daughter and one son and the son has only one daughter)	Mine workers or fishman for 5 years, or husband join wife’s household		Both, or one is only child for two generations	One widowed and one childless, or one childless and the other has one child	Both live in coastal area, first birth girl. Disabled child, one is disabled veteran (2B), return from abroad/HK/Macao/Taiwan, infertile and adoption.
Jiangsu	2002, 2004	Wife is rural and (one is the only child, or all husband’s brothers are infertile)	As Jiangsu 1997, “husband joins wife’s household” only applies to one sister, husband does not have brothers, or one is disabled and the household works in planting and fishing		As Jiangsu 1997	As Jiangsu 1997	One is only child of martyr， the rest as Jiangsu 1997
Jiangsu	2014	As Jiangsu 2002	As Jiangsu 2002		one	As Jiangsu 1997	As Jiangsu 1997
Zhejiang	1995	Both rural and (one only child for two generations, or husband join wife’s household (only applies to one sister))	Mine workers for 5 years, or fishman and both rural with difficulties with real difficulties or mountains where fertility is well controlled		both	One childless and the other has one child	Child disabled, infertile and adoption, only child of martyr, birth interval 4 years except that wife is more than 28
Zhejiang	2002, 2007	Both rural and (husband join wife’s household, or one is minority and has local hukou for 2 generations)	Both rural, or mine workers for 5 years	both	both	As Zhejiang 1995	As Zhejiang 1995 (no birth interval restrictions since 2007)
Anhui	1988, 1992, 1995, 1999, 2002, 2004, 2011	Husband join wife’s household (only applies to one sister in the wife’s household), or one is only child	Both rural, or wife is rural and live in the mountains	both	both	One is childless and the other has one or two children (two in the case of widowed)	Child disabled, mine worker and only has a daughter, adoption, infertile couple adopt child of his/her brother or sister, disabled because of public service, returned from abroad, birth interval 3 years
Anhui	2014	Husband join wife´s household	As Anhui 1988	As Anhui 1988	one	As Anhui 1988	As Anhui 1988
Fujian	1991	Both rural and (both the only child, husband join wife’s household (only applies to one sister), husband’s brothers are all infertile and childless)	Both rural or fisherman, or one is mine worker for 5 years	(Both rural, or both live in minority-concentrated area) and (both the only child or disabled child or remarriage and no more than 2 children before remarriage)	One is only child for 2 generations	No more than 1 child before remarriage	Both rural and less populous area. Disabled child, adoption, one is only child of a martyr, disabled due to public service (2A), returned from abroad
Fujian	2002, 2012	Both rural and (One is the only child, or husband join wife’s household, or husband’s brothers are all infertile and childless)	As Fujian 1991	As Fujian 1991	both	One child before remarriage or two children and if one remarried after widowhood	As Fujian 1991
Fujian	2014	As Fujian 1991 (a return to stricter policy)	As Fujian 1991	As Fujian 1991	one	As Fujian 2002	As Fujian 1991
Jiangxi	1995, 2002, 2009	Husband join wife’s household (only applies to one sister), or one is the only child for two generations, or all brothers of husband are fertile and childless	Both rural or mine workers for 5 years	Both and live in minority-concentrated area	Both	One childless and the other has one child	Child disabled or died, one is only child of martyr or disabled veteran (2B), returned from abroad/HK/Macao/Taiwan
Jiangxi	2014	As Jiangxi 1995	As Jiangxi 1995	As Jiangxi 1995	one	As Jiangxi 1995	As Jiangxi 1995
Shandong	1988, 1996, 2002, 2013	Both rural and (husband join wife´s household (only applies to one sister), or all brothers are childless and infertile)	Wife and daughter both rural, mine workers or fishman for 5 years, one disabled due to public service	both	both	One childless and the other has one child	Live in islands. Child disabled, infertile and adoption, had the first birth no earlier than 25 and second birth no earlier than 30
Shandong	2014	As Shandong 1988	As Shandong 1988	As Shandong 1988	one	As Shandong 1988	As Shandong 1988
Henan	1990, 2000, 2002	Husband joins wife’s household (only applies to one sister)	One rural	Both and rural		One childless and the other has one child	living in the mountains for more than 5 years. Disabled child, infertile and adoption, only child of martyr, mine workers for 5 years and first birth female, If first birth was born earlier than 28, the birth interval should be 4 years.
Henan	2011	As Henan1990	Both rural	As Henan1990	both	As Henan1990	As Henan1990
Henan	2014	As Henan1990	As Henan1990	As Henan1990	one	As Henan1990	birth interval restriction deleted, the rest as Henan 1990
Hubei	1987, 1991, 1997	Wife is rural and one is the only child for 2 generations, husband joins wife’s household, disabled veteran (2B)	Wife is rural			One childless and the other has one child	Child disabled, infertile and adoption, returned from abroad/HK/Macao/Taiwan.
Hubei	2002, 2008	As Hubei 1987	As Hubei 1987	Both minority and rural	Both	One childless and the other has one child, or one childless and the other widowed with two children	As Hubei 1987
Hubei	2014	Deleted “one is only child for 2 generations” and “husband joins wife’s household”	As Hubei 1987	As Hubei 2002	one	As Hubei 2002	As Hubei 1987
Hunan	1989, 1999, 2003, 2007	Both rural and (one is the only child for 2 generations, or husband join wife’s household, or one minority, or only one brother is fertile, or one is child of martyr or veteran himself)	yes	Both minority and one rural	Both	One childless and the other has one child	Child disabled, adoption, Birth interval 4 years except more than 28 (deleted since 2007), return from abroad/HK/Macao/Taiwan
Hunan	2015	Both rural and veteran, or all siblings of one couple are infertile	As Hunan 1989	As Hunan 1989	one	As Hunan 1989	As Hunan 2007
Guangdong	1980					yes	Penalties and bonus. Birth interval 4 years
Guangdong	1986	Could be considered	Could be considered and given priority	Minority living in minority concentrated area	both	One couple has a child and the other childless, or each have one child before remarriage but no common child	Child disabled, infertile and adoption, fishman or mine workers for more than 5 years. Birth interval 4 years
Guangdong	1992, 1997	Could be considered via application		Could be considered	As Guangdong 1986	As Guangdong 1986	As Guangdong 1986
Guangdong	1998, 1999		Both rural	Both rural living in minority concentrated are	As Guangdong 1986	As Guangdong 1986	As Guangdong 1986
Guangdong	2002, 2008	Both rural and one minority and live in the minority’s household	Both rural, or one rural and minority	As Guangdong 1998	As Guangdong 1986	As Guangdong 1986	Birth interval should be more than 4 years except that (the woman is more than age 28 or infertile and adoption or disabled child)
Guangdong	2014	As Guangdong 2002	As Guangdong 2002		one	As Guangdong 1986	NA
Guangxi	1994， 1997	Wife is rural and husband joins wife’s household (only applies to one sister of wife’s household)	Wife is rural	both	both	One is childless and the other has one child before remarriage	Wife is rural and border areas (5 km from borders). Child disabled, infertile and adoption, disabled due to public service (one 2A or both 2B), one is only child of martyr, only one of the brothers is fertile, birth interval 4 years and has to pay for social supporting fee. Rural hukou is the wife’s hukou
Guangxi	2002, 2004, 2012	As Guangxi 1994	As Guangxi 1994	As Guangxi 1994	As Guangxi 1994	As Guangxi 1994	Birth interval 4 years except that woman is older than 28 (no more restriction on birth interval since 2012). The rest as Guangxi 1994.
Guangxi	2014	As Guangxi 2002	As Guangxi 2002	As Guangxi 2002	one	As Guangxi 2002	As Guangxi 2002
Hainan	1990, 1995, 2002	Could be considered via application		One is minority living in minority concentrated area	both	One childless and the other one child, or each has one child but no common child, or one widowed and has two children	Child disabled, infertile and adoption, birth interval 4 years, disabled due to public service (1990 policy, abolished in 1995), returning from abroad/HK/ Macao/Taiwan and first birth female (1990 policy and was abolished in 1995)
Hainan	2014	As Hainan 1990	As Hainan 1990	As Hainan 1990	one	As Hainan 1990	As Hainan 1990
Chongqing	1997, 2000, 2002, 2005, 2011	Both rural and (only child of martyr or disabled veteran, or all brothers are infertile, or only child for two generations, or husband join wife’s household)	Live in mountains and faraway areas		both	One childless and the other has 1 child	Live in minority-concentrated area, both rural and one is minority. Child disabled, infertile and adoption, birth interval 4 years
Chongqing	2014	deleted “only child of martyr” and “husband joins wife’s household”), the rest as Chongqing 1997	As Chongqing 1997		one	As Chongqing 1997	As Chongqing 1997
Sichuan	1993, 2002, 2004	Husband join wife’s household, or one is disabled veteran, or all brothers are infertile, or one only child for two generations	Rural and live in mountain area		both	One childless and the other has one child	Child disabled, infertile and adoption, returned from abroad/HK/Macao/Taiwan
Sichuan	2014	As Sichuan 1993	As Sichuan 1993		one	As Sichuan 1993	As Sichuan 1993
Guizhou	1987, 1998, 2002, 2009	Both rural and (husband joins wife’s household or one minority)	Both rural		both	One is childless and the other has one child	Infertile and adoption, birth interval 4 years
Guizhou	2014	As Guizhou 1987	As Guizhou 1987		one	As Guizhou 1987	Infertile and adoption (birth interval restriction deleted)
Guizhou	2015	Both rural and one minority (‘husband joins wife’ deleted)	As Guizhou 1987		As Guizhou 2014	As Guizhou 1987	As Guizhou 2014
Yunnan	1990, 1997, 2002	Real difficulty and minority is given priority			both	One childless and the other has 1 child	Both live in border area. Child disabled, infertile and adoption, one is disabled veteran, returned from abroad/HK/Macao/Taiwan, birth interval 4 years
Yunnan	2015	As Yunnan 1990		One is certain minority	one	As Yunnan 1990	As Yunnan 1990
Shaanxi	1997, 2002, 2009	Both rural and (husband join wife’s household or one is disabled)	Both rural and with “real difficulties”	both	both	One childless and the other has one child	Both rural and live in less populous and mountainous area. Child disabled, infertile and adoption, both return from abroad/HK/Macao/Taiwan, birth intervals 4 years
Gansu	1997	Both rural and (both minorities, or husband join wife´s household (only applies to one sister of the wife’s household))	Both rural			One childless and one has a child before remarriage	Disabled child, infertile and adoption, one is disable due to public service (2B), birth interval at least 4 years (3 years after 2000)
Gansu	2002, 2005	Both rural and (one minority or husband join wife´s household (only applies to one sister of the wife’s household))	As Gansu 1997	One from certain minority	both	As Gansu 1997	As Gansu 1997
Gansu	2014	As Gansu 2002	As Gansu 1997	As Gansu 2002	one	As Gansu 1997	As Gansu 1997
Qinghai	1992, 1999, 2002	Minority or with “real difficulties”		One	both	One childless and the other has one child	Child disabled, infertile and adoption, return from abroad, disabled (2A), birth interval 4 years
Ningxia	1986, 1990, 1999, 2002, 2009	One rural		one	both	One childless and one has one child	Eight counties in the mountain area. Infertile and adoption and wife more than 30, child disabled, one returned from abroad/HK/Macao/Taiwan, husband mine workers for more than 5 years, birth interval 4
Ningxia	2014	As Ningxia1986		As Ningxia1986	one	As Ningxia 1986	As Ningxia1986
Xinjiang	2002, 2004, 2006, 2010	yes		yes	both	One child in total before remarriage	Disabled veteran, infertile and adoption, mine workers for 5 years, one is only child of martyr，child disabled,
							birth interval 3 years (before 2006).
							minority household means if one is minority, urban household means if one is urban

## Sheet: one-child policy era 3rd
Province	Year	Policy domain:
		Rural	minority	Remarriage	others
Inner Mongolia	1990	Both rural and Mongolian	certain minority group	One childless and the other widowed with two children
Inner Mongolia	1995, 2002, 2008	Both rural and Mongolian and previous two births both female	As Inner Mongolia 1990	As Mongolia 1990, or minority and one childless and one has two children, or both minority and each has one child
Liaoning	2014			One childless and the other has two children, each has one child before remarriage and one is the only child, or one is the only child and childless and the other has one child and one common child, one widowed and each has one child	Child died or disabled, or infertile and adoption
Jilin	2002	Both rural and agriculture forestry animal husbandry side line occupations and fishery with no salary and one is childless		one widowed and the other childless, or one childless and the other no more than two children, or each has one child and one disabled
Jilin	2011	As Jilin 2002		One childless or each has one child
Heilongjiang	1989		One is certain minority		Birth interval 4 years
Heilongjiang	1994, 2000, 2002, 2014, 2015		Both belongs to certain minority groups	One childless and the other no more than 2	As Heilongjiang 1989
Shanghai	2002, 2014			One childless and the other has 2 children, or each has one child and both the only child, or each one child and one rural and one only child, or each one child and disabled child
Jiangsu	2004, 2014				Child died
Zhejiang	2002, 2007			One childless and one widowed with two children
Fujian	1991, 2000, 2002, 2012	First two births female	both only child and (both minority or live or work in minority-concentrated area)	One childless and one widowed with two children
Shandong	1988, 1996, 2002, 2013, 2014			Each has one child and both guardianships belong to previous partner and no common child	Returned from abroad and no children returned, wife more than 30 and was more than 25 when having the first child
Hunan	2015			Both rural and each has 1 child and one child is disabled
Guangdong	1986		Minority living in minority concentrated area with “real difficulties”
Hainan	1989, 1995	Rural and live in minority concentrated area with “real difficulties”
Hainan	2002, 2014	Rural and live in minority concentrated area and one is minority and first two births female
Chongqing	1997, 2000, 2002, 2005, 2011			One childless and one widowed with two children
Sichuan	1993, 2002, 2004			One widowed and has two children and the other childless
Yunnan	2015		Rural and minority and (One belong to certain minority or both live in border area)	Rural and one widowed and has two children and the other childless	Birth interval 4 years (with possibility of shortening to 3 years)
Gansu	2002, 2005, 2014	Both rural and one from certain minority
Qinghai	1992, 1999, 2002				Both minorities live in pastoral area. Birth interval 4 years
Ningxia	1986			One unmarried and more than 28 and the other has two children, or one is first marriage and childless and the other is widowed with two children	Eight counties in the mountain . Birth interval 4 years
Ningxia	1990, 1999, 2002, 2009			One first marriage and more than 30 and the other was widowed with two children, or rural and minority and live in the eight mountainous counties having two children in total before marriage	As Ningxia 1986
Ningxia	2014			As Ningxia 1999, or one is only child and childless and (the other has one child and one common child or two children), or one is the only child and each has one child
Xinjiang	2002, 2004, 2006, 2010	minority		(Minority or rural) and has two children before remarriage	Minority and adopted 2 children

## Sheet: two-child policy era 3rd
Province	Year	Policy domain:
		Minority	remarriage	others
Beijing	2016		One child before remarriage and one common child, or no common child, or two common children but one is disabled
Tianjin	2016		One has one child and one common child, or no common child	Child disabled
Hebei	2016		One childless and the other has one child, or have two children in total before remarriage and no common child	Child disabled
Shanxi	2016		One has one child and one common child, no common child, or one is childless	Child disabled
Inner Mongolia	2016, 2019	Both rural and of Mongolian ethnicity and first two births female, respect the fertility intention of minorities belonging to certain minorities	No common child, or one child and one common child	Child disabled
Liaoning	2016, 2018		One child in total and one common child, or no common child
Jilin	2016		One childless and the other has two children or more, one childless and the other has one child and one common child	One live in the border area. Child disabled
Heilongjiang	2016, 2018	One belongs to certain minority groups	One childless and the other has one child, or have some children in total before remarriage and no common child	Both living in border area. Child disabled, returned from abroad/HK/Macao/Taiwan
Shanghai	2016		One childless and the other has one child and one common child, or no common child, or both childless before remarriage and two common children but have disabled child
Jiangsu	2016		One childless and the other has one child, or have two children in total before remarriage and no common child	Child died or disabled
Zhejiang	2016		One childless and the other has one child, or have two children in total before remarriage and no common child	One disabled or dead
Anhui	2016		One common child and one child before remarriage, or no common child and no more than two children before remarriage	Child disabled
Fujian	2016	Both only child, rural and minority. One Han married to a minority and live in the household of the minority and live in the minority concentrated area for more than 5 years is counted as a minority household.	One childless and the other has one child, or have two children in total before remarriage and no common child	Child disabled, adoption, returned from abroad and the children are now living abroad
Jiangxi	2016, 2018		One childless and the other has one child, or have two children in total before remarriage and no common child	Child died or disabled, adoption
Shandong	2016		One has two children and the other childless and no common child, or one has one child and one common child, or each has one child and one common child (the 4th child)	Child disabled, infertile and adoption
Henan	2016		Have two children in total before remarriage and no common child	Child both disabled
Hubei	2016, 2020		One childless and the other has one child, or have two children or more in total before remarriage	One disabled, adoption
Hunan	2016		One childless and one has one child and one common child, or two children in total before remarriage	Child disabled, adoption
Guangdong	2016, 2018, 2019		One childless and the other has one child and one common child, or one childless and one has two children, or one has one child and the other has two children (the 4th child possible)	Child died or disabled
Guangxi	2016, 2019		One childless and the other has two children (the 4th child possible), or one childless and the other has one child and one common child, or one has two children and the other has one child and no common child	Living in a rural area within 5 miles to the border for more than 10 years. Child died or disabled
Hainan	2016, 2018	Rural living in minority concentrated area and one is minority and first two births female	One childless and the other has one child, or have two children in total before remarriage and no common child	Child died or disabled
Chongqing	2016		One childless and the other has one child, or have two children in total before remarriage and no common child	Child disabled
Sichuan	2016	Minority policy depends on policies made by the minority concentrated county		Child disabled, one couple is disabled
Guizhou	2016, 2018		Each has one child, or one childless and the other has two children (the 4th child possible)	Child disabled
Yunnan	2016, 2018	Rural and minority and (both live in minority area or one belongs to certain minorities)	Each has one child, or one has one child and one common child, or one childless and the other has two children
Tibet	2016
Shaanxi	2016		One childless and the other has one child and one common child, or no common child	Child disabled
Gansu	2016	Both rural living in ethnic minority concentrated area and one belongs to certain ethnic minorities	One childless and the other has one child, or have two children in total before remarriage and no common child	Child disabled, adoption
Qinghai	2016, 2019	Minority couple living in Pastoral area	Two or more in total before remarriage	Child died or disabled, Infertile and adoption
Ningxia	2016, 2019		One child and one common child, or two children in total before remarriage	Eight counties in the mountain, and rural and minority. Child disabled
Xinjiang	2017		have one child in total before remarriage and one common child, or have two children in total before remarried	Both rural, birth interval 3 years except that wife more than 30
